# Supplementary material for: Use of barbed sutures in robotic bariatric bypass surgery: a single-center case series
Source: BMC Surg. 2019 Jul 23;19:97. doi: 10.1186/s12893-019-0563-z (PMC6651907; doi:10.1186/s12893-019-0563-z)
Supplement: Supplementary file 2 — Complete dataset of robotic RYGB surgeries. (CSV 3 kb) [file 12893_2019_563_MOESM2_ESM.csv]

	BMI	EOSS	procedure	Clavien-Dindo	reoperation	%TWL 30d	%EWL 30d	operative time	robotic time	LOS
1	51,2	2	Robotic dist. RYGB ReDo	none	0	8 %	17 %	02:46	02:08	4
2	46,8	2	Robotic dist. RYGB ReDo	none	0	7 %	15 %	02:22	01:46	4
3	46,9	3	Robotic dist. RYGB ReDo	Grade 2	0	3 %	5 %	02:09	01:32	5
4	56,8	3	Robotic dist. RYGB ReDo	none	0	7 %	12 %	02:20	01:45	4
5	50,8	3	Robotic dist. RYGB ReDo	none	0	14 %	28 %	01:53	01:31	4
6	41,2	2	Robotic dist. RYGB ReDo	none	0	5 %	13 %	01:55	01:32	5
7	48,1	3	Robotic dist. RYGB ReDo	none	0			02:14	01:45	5
8	53,5	3	Robotic dist. RYGB ReDo	none	0	4 %	7 %	01:46	01:25	5
9	36,7	1	Robotic dist. RYGB ReDo	none	0	5 %	16 %	01:32	01:09	3
10	41,4	3	Robotic prox. RYGB	none	0	14 %	35 %	02:29	01:42	4
11	40,0	4	Robotic prox. RYGB	Grade 3a	0	13 %	34 %	02:52	01:57	4
12	50,0	2	Robotic prox. RYGB	none	0	11 %	21 %	02:21	01:52	4
13	52,3	2	Robotic prox. RYGB	none	0	10 %	20 %	02:37	02:01	5
14	54,1	3	Robotic prox. RYGB	none	0	9 %	17 %	02:43	01:57	5
15	50,4	3	Robotic prox. RYGB	none	0	7 %	13 %	02:26	01:43	4
16	46,8	3	Robotic prox. RYGB	none	0	6 %	13 %	02:27	01:52	4
17	51,4	2	Robotic prox. RYGB	none	0	12 %	24 %	01:51	01:16	4
18	38,9	2	Robotic prox. RYGB	none	0	13 %	37 %	02:07	01:40	2
19	44,8	3	Robotic prox. RYGB	none	0	13 %	30 %	02:06	01:36	4
20	46,9	2	Robotic prox. RYGB	none	0	11 %	23 %	01:45	01:17	5
21	52,1	2	Robotic prox. RYGB	Grade 3b	1	8 %	15 %	01:55	01:24	8
22	48,7	3	Robotic prox. RYGB	none	0	20 %	40 %	02:23	01:56	4
23	48,4	3	Robotic prox. RYGB	none	0	6 %	13 %	02:05	01:36	4
24	40,2	3	Robotic prox. RYGB	none	0	9 %	24 %	02:01	01:32	4
25	51,3	3	Robotic prox. RYGB	none	0	9 %	17 %	01:53	01:25	4
26	45,3	2	Robotic prox. RYGB	none	0	11 %	24 %	01:30	01:06	4
27	47,8	4	Robotic prox. RYGB	none	0	7 %	16 %	02:06	01:33	5
28	47,0	2	Robotic prox. RYGB	none	0	6 %	14 %	01:46	01:23	3
29	44,3	2	Robotic prox. RYGB	none	0	11 %	25 %	01:54	01:26	4
30	47,3	3	Robotic prox. RYGB	none	0	12 %	25 %	03:48	03:05	5
31	48,3	2	Robotic prox. RYGB	none	0	12 %	25 %	01:51	01:23	4
32	47,8	2	Robotic prox. RYGB	none	0	8 %	16 %	01:36	01:13	4
33	53,3	2	Robotic prox. RYGB	none	0	8 %	16 %	01:50	01:26	4
34	44,3	2	Robotic prox. RYGB	none	0	8 %	19 %	01:35	01:15	3
35	53,8	2	Robotic prox. RYGB	Grade 1	0	3 %	5 %	01:50	01:18	6
36	45,9	1	Robotic prox. RYGB	none	0	11 %	24 %	01:17	01:02	4
37	50,0	4	Robotic prox. RYGB	none	0	8 %	16 %	02:07	01:34	5
38	52,1	3	Robotic prox. RYGB	none	0	8 %	16 %	01:59	01:34	4
39	46,5	2	Robotic prox. RYGB	none	0	9 %	21 %	01:12	00:56	3
40	44,8	1	Robotic prox. RYGB	none	0	11 %	24 %	01:22	01:04	4
41	45,3	1	Robotic prox. RYGB	none	0	12 %	26 %	02:16	01:46	4
42	48,9	3	Robotic prox. RYGB	none	0	10 %	21 %	02:08	01:40	4
43	38,8	4	Robotic prox. RYGB	none	0	7 %	19 %	01:21	01:08	4
44	42,2	3	Robotic prox. RYGB	none	0	12 %	29 %	01:37	01:13	2
45	43,0	3	Robotic prox. RYGB	none	0	13 %	30 %	01:43	01:21	4
46	46,1	2	Robotic prox. RYGB	none	0	9 %	21 %	01:40	01:13	4
47	50,1	2	Robotic prox. RYGB ReDo	none	0	7 %	14 %	02:50	02:11	4
48	35,9	3	Robotic prox. RYGB ReDo	none	0	9 %	29 %	02:18	01:47	5
49	29,4	2	Robotic prox. RYGB ReDo	none	0	1 %	8 %	02:47	02:23	4
50	31,0	3	Robotic prox. RYGB ReDo	none	0	5 %	27 %	04:46	04:22	7
